# Supplementary material for: A mixed valent heterometallic CuII/NaI coordination polymer with sodium–phenyl bonds
Source: Royal Society of Chemistry journal article supplement (doi:10.1039/c4dt00189c), 2014-01-01
Supplement: c4dt00189c1.pdf [file c4dt00189c1.pdf]

## Supporting Information

### A Mixed Valent Heterometallic Cu<sup>II</sup>/Na<sup>I</sup> Coordination Polymer with Sodium-Phenyl Bonds

*Amitabha Datta,<sup>†,\*</sup> Kuheli Das,<sup>‡</sup> Chiara Massera,<sup>§</sup> Jack K. Clegg,<sup>||,\*</sup> Chittaranjan*

*Sinha,<sup>‡</sup> Jui-HsienHuang,<sup>†,\*</sup> Eugenio Garribba<sup>⊥</sup>*

<sup>†</sup> Department of Chemistry, National Changhua University of Education, Changhua 50058, Taiwan.

<sup>‡</sup> Department of Chemistry, Inorganic Chemistry Section, Jadavpur University, Kolkata – 700032, India

<sup>§</sup> Dipartimento di Chimica, Università degli Studi di Parma, Viale delle Scienze, 17/A, 43124 Parma,  
Italy

<sup>||</sup> School of Chemistry and Molecular Biosciences, The University of Queensland, Brisbane St Lucia,  
QLD 4072, Australia

<sup>⊥</sup> Dipartimento di Chimica e Farmacia, and Centro Interdisciplinare per lo Sviluppo della Ricerca  
Biotecnologica e per lo Studio della Biodiversità della Sardegna, Università di Sassari, Via Vienna 2, I-  
07100 Sassari, Italy

**Table S1.** Hydrogen Bond Geometry

| Donor | Hydrogen | Acceptor            | D-H (Å)   | H-A (Å)   | D-A (Å)  | DHA (°) |
|-------|----------|---------------------|-----------|-----------|----------|---------|
| O(5)  | H(10)    | O(19)               | 0.84      | 1.86      | 2.662(4) | 160.5   |
| O(10) | H(20)    | O(12)               | 0.84      | 1.99      | 2.793(4) | 159.0   |
| O(10) | H(20)    | O(13)               | 0.84      | 2.61      | 3.309(5) | 141.2   |
| O(10) | H(20)    | Cl(1)               | 0.84      | 2.81      | 3.634(3) | 166.8   |
| O(19) | H(30)    | O(14) <sup>i</sup>  | 0.887(10) | 1.958(16) | 2.807(6) | 160(4)  |
| O(19) | H(40)    | O(17) <sup>ii</sup> | 0.883(10) | 1.922(16) | 2.785(5) | 166(3)  |
| O(19) | H(40)    | Cl(2) <sup>ii</sup> | 0.883(10) | 2.66(3)   | 3.329(3) | 134(3)  |

## Symmetry Operators

<sup>i</sup> x+1, y, z+1 <sup>ii</sup> -x-1, y+1/2, -z-1
**Table S2.** EPR parameters of the polycrystalline powder of **1**.<sup>[a]</sup>

| Temperature / K | $g_x$ | $g_y$ | $g_z$ |
|-----------------|-------|-------|-------|
| 298             | 2.047 | 2.047 | 2.185 |
| 77              | 2.048 | 2.048 | 2.181 |

<sup>[a]</sup> For Ref<sup>[SI 1]</sup>,  $g_z = 2.182$ ,  $g_x = g_y = 2.053$  at RT, and  $g_z = 2.187$ ,  $g_x = g_y = 2.054$  at 77 K.

**Table S3.** EPR parameters of **1** and Ref<sup>[SI 1]</sup> in organic solvents.

| Species         | Solvent            | $g_x$ | $A_x / 10^{-4} \text{ cm}^{-1}$ | $g_y$ | $A_y / 10^{-4} \text{ cm}^{-1}$ | $g_z$ | $A_z / 10^{-4} \text{ cm}^{-1}$ |
|-----------------|--------------------|-------|---------------------------------|-------|---------------------------------|-------|---------------------------------|
| <b>1</b>        | DMSO               | 2.038 | 11                              | 2.069 | 13                              | 2.243 | 187                             |
| <b>1</b>        | DMF                | 2.038 | 11                              | 2.069 | 13                              | 2.243 | 187                             |
| <b>1</b>        | CH <sub>3</sub> CN | 2.039 | 12                              | 2.070 | 14                              | 2.243 | 188                             |
| Ref <b>SI 1</b> | DMSO               | 2.037 | 11                              | 2.069 | 13                              | 2.243 | 187                             |
| Ref <b>SI 1</b> | DMF                | 2.037 | 11                              | 2.070 | 12                              | 2.243 | 187                             |

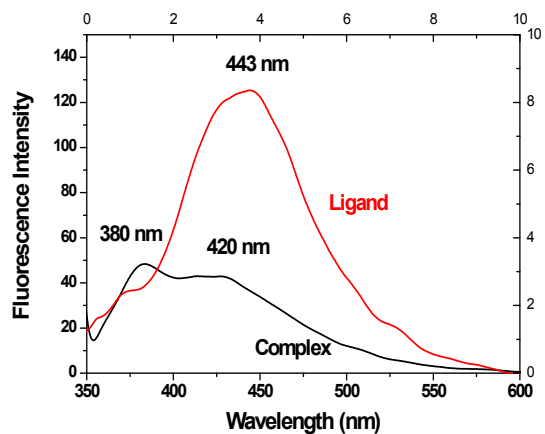

Fig. S11 Emission spectra of the ligand and complex 1 (in MeOH).  $\lambda_{\text{ex}}$  330 nm (ligand);  $\lambda_{\text{ex}}$  360 nm (complex). Fluorescence intensity is given in arbitrary units.

## References

[SI 1] K. Das, A. Datta, J.K. Clegg, E. Garribba, S. Roy, C. Sinha, submitted to Polyhedron.
